# Supplementary material for: Machine-learning-assisted performance improvements for multi-resonance thermally activated delayed fluorescence molecules
Source: Royal Society of Chemistry journal article supplement (doi:10.1039/d3cp04441f), 2023-11-30
Supplement: d3cp04441f1.pdf [file d3cp04441f1.pdf]

## Supporting Information

### **Machine-learning-assisted performance improvements for multi-resonance thermally activated delayed fluorescence molecules**

Wanlin Cai,<sup>a</sup> Cheng Zhong<sup>b</sup>, Zi-Wei Ma<sup>a</sup>, Zhuan-Yun Cai<sup>a</sup>, Yue Qiu<sup>c</sup>, Zubia Sajid<sup>a</sup>, and  
De-Yin Wu<sup>\*a</sup>

<sup>a</sup> *State Key Laboratory of Physical Chemistry of Solid Surface, Collaborative Innovation Center of Chemistry for Energy Materials, and Department of Chemistry, College of Chemistry and Chemical Engineering, Xiamen University, Xiamen, 361005, P. R. China*

<sup>b</sup> *Hubei Key Lab on Organic and Polymeric Optoelectronic Materials, Department of Chemistry, Wuhan University, Wuhan, Hubei 430072, P. R. China*

<sup>c</sup> *Grimwade Centre for Cultural Materials Conservation, School of Historical and Philosophical Studies, Faculty of Arts University of Melbourne, Parkville, VIC 3052, Australia*

E-mail: [dywu@xmu.edu.cn](mailto:dywu@xmu.edu.cn)

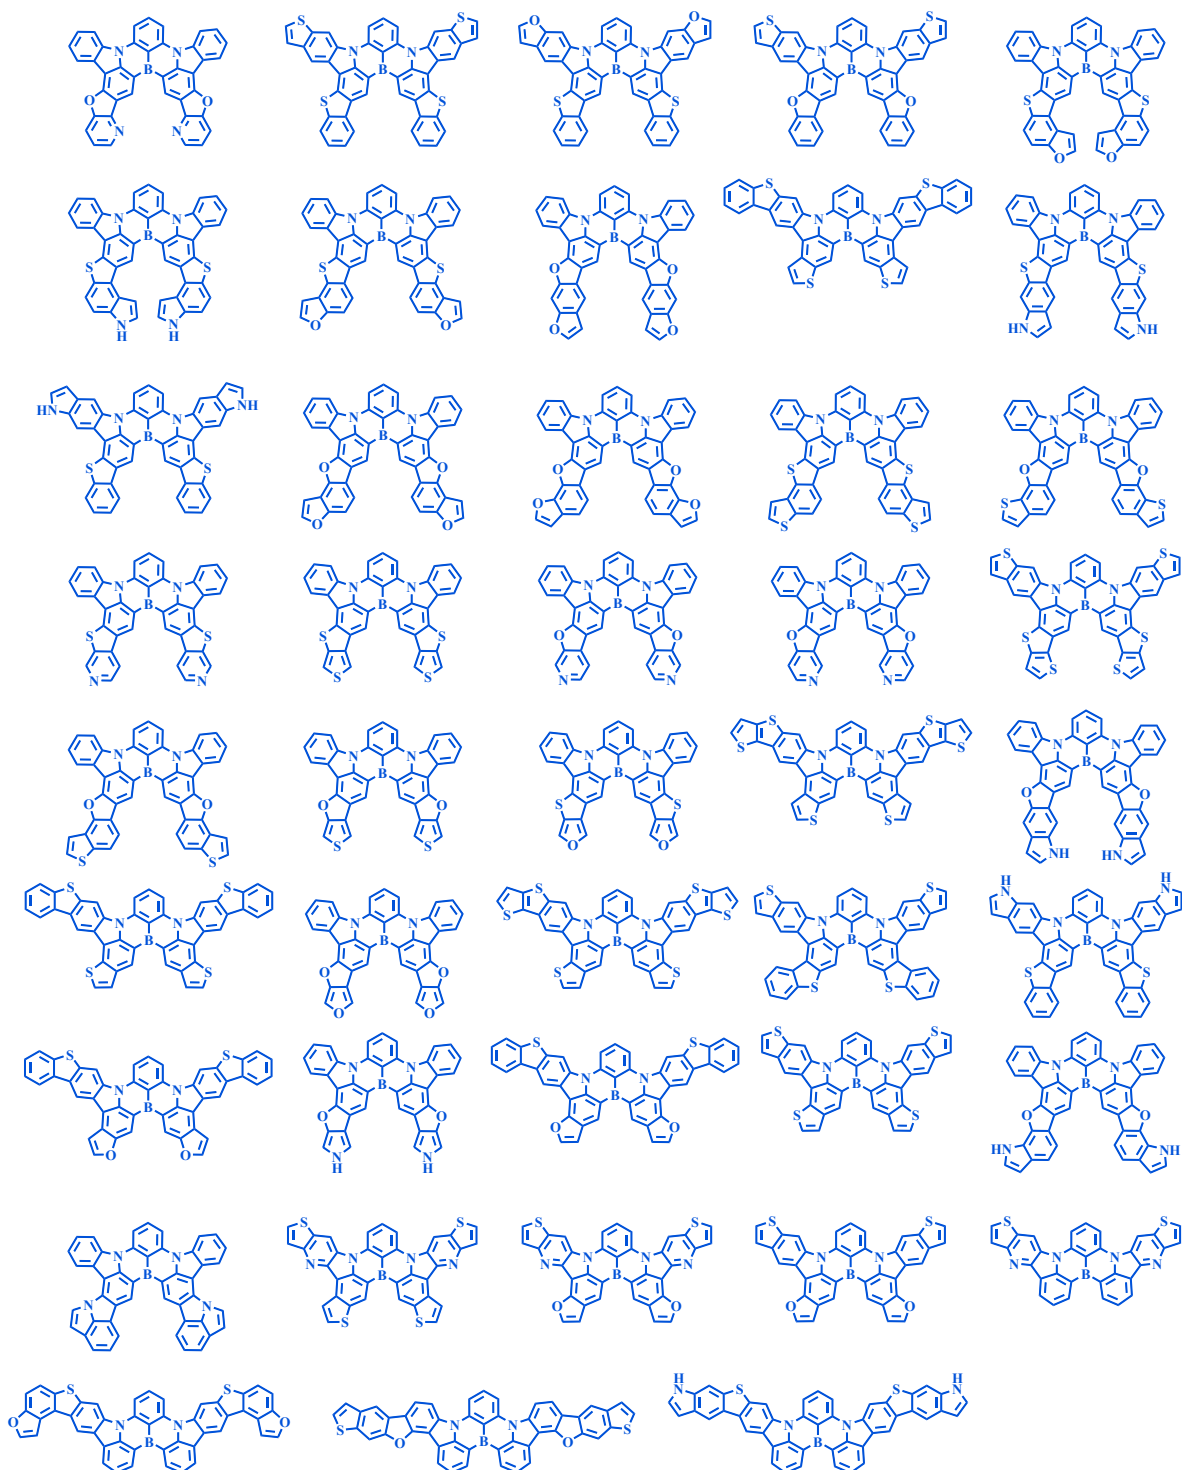

**Figure S1.** Chemical structure of the suggested molecules based on **Core\_1** among the top 100 molecules.

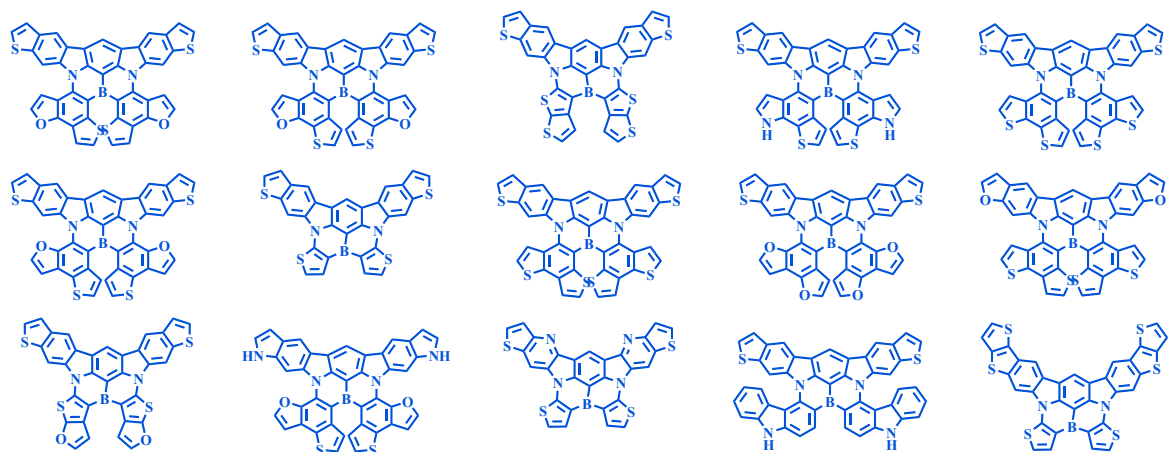

**Figure S2.** Chemical structure of the suggested molecules based on **Core\_2** among the top 100 molecules.

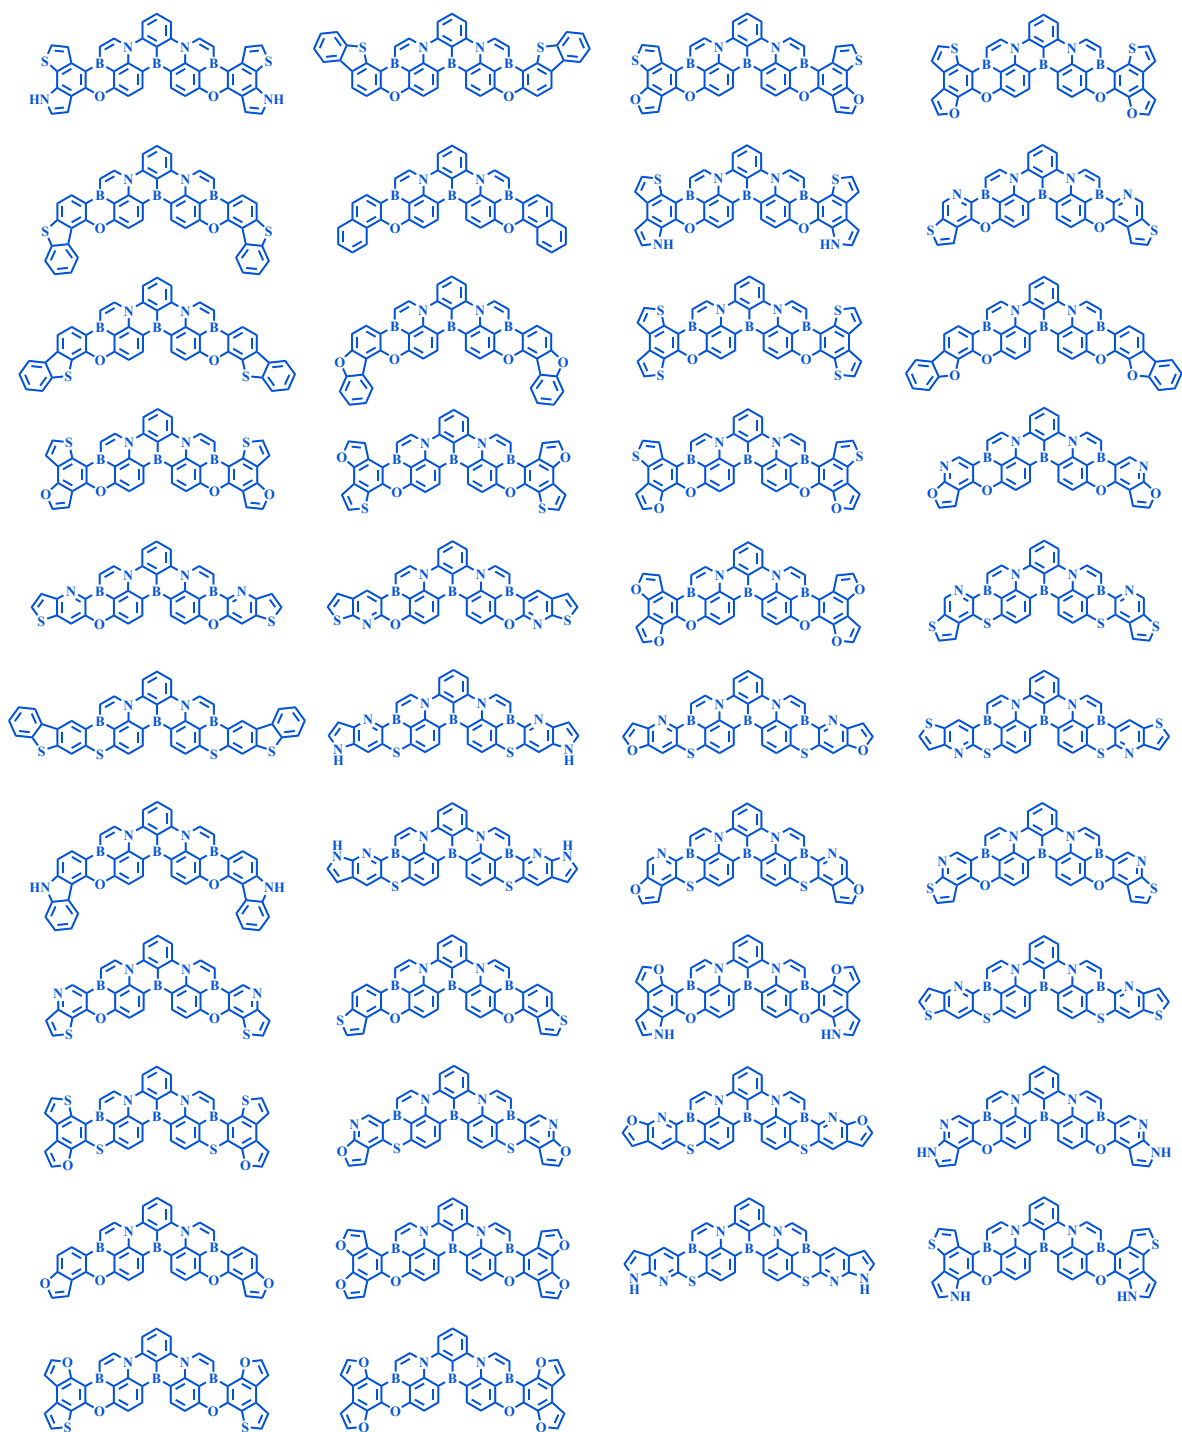

**Figure S3.** Chemical structure of the suggested molecules based on **Core\_3** among the top 100 molecules.

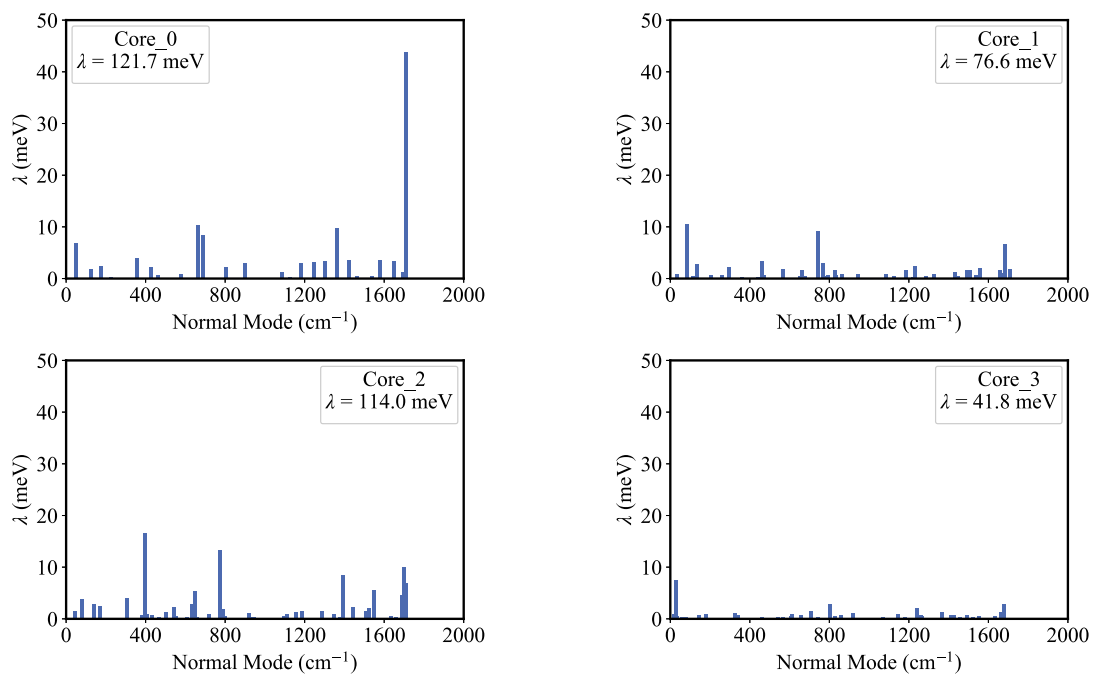

**Figure S4.** The contribution of the normal modes to  $\lambda_{em}$ , for the four cores.

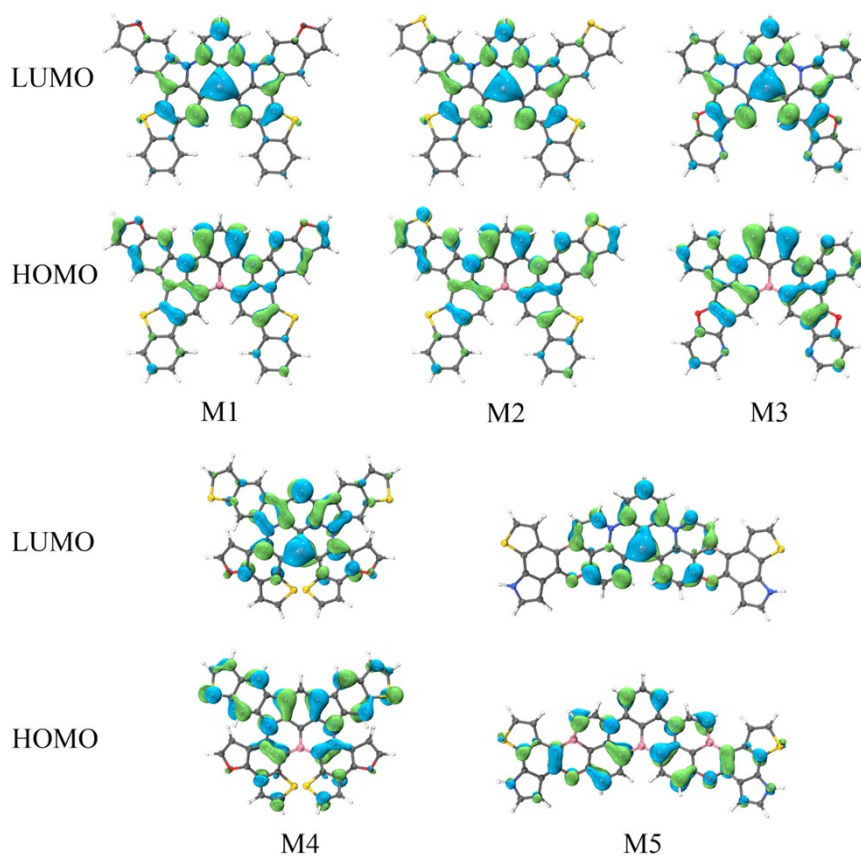

**Figure S5.** HOMO and LUMO distribution (isovalue = 0.03 au) for the top 5 molecules.

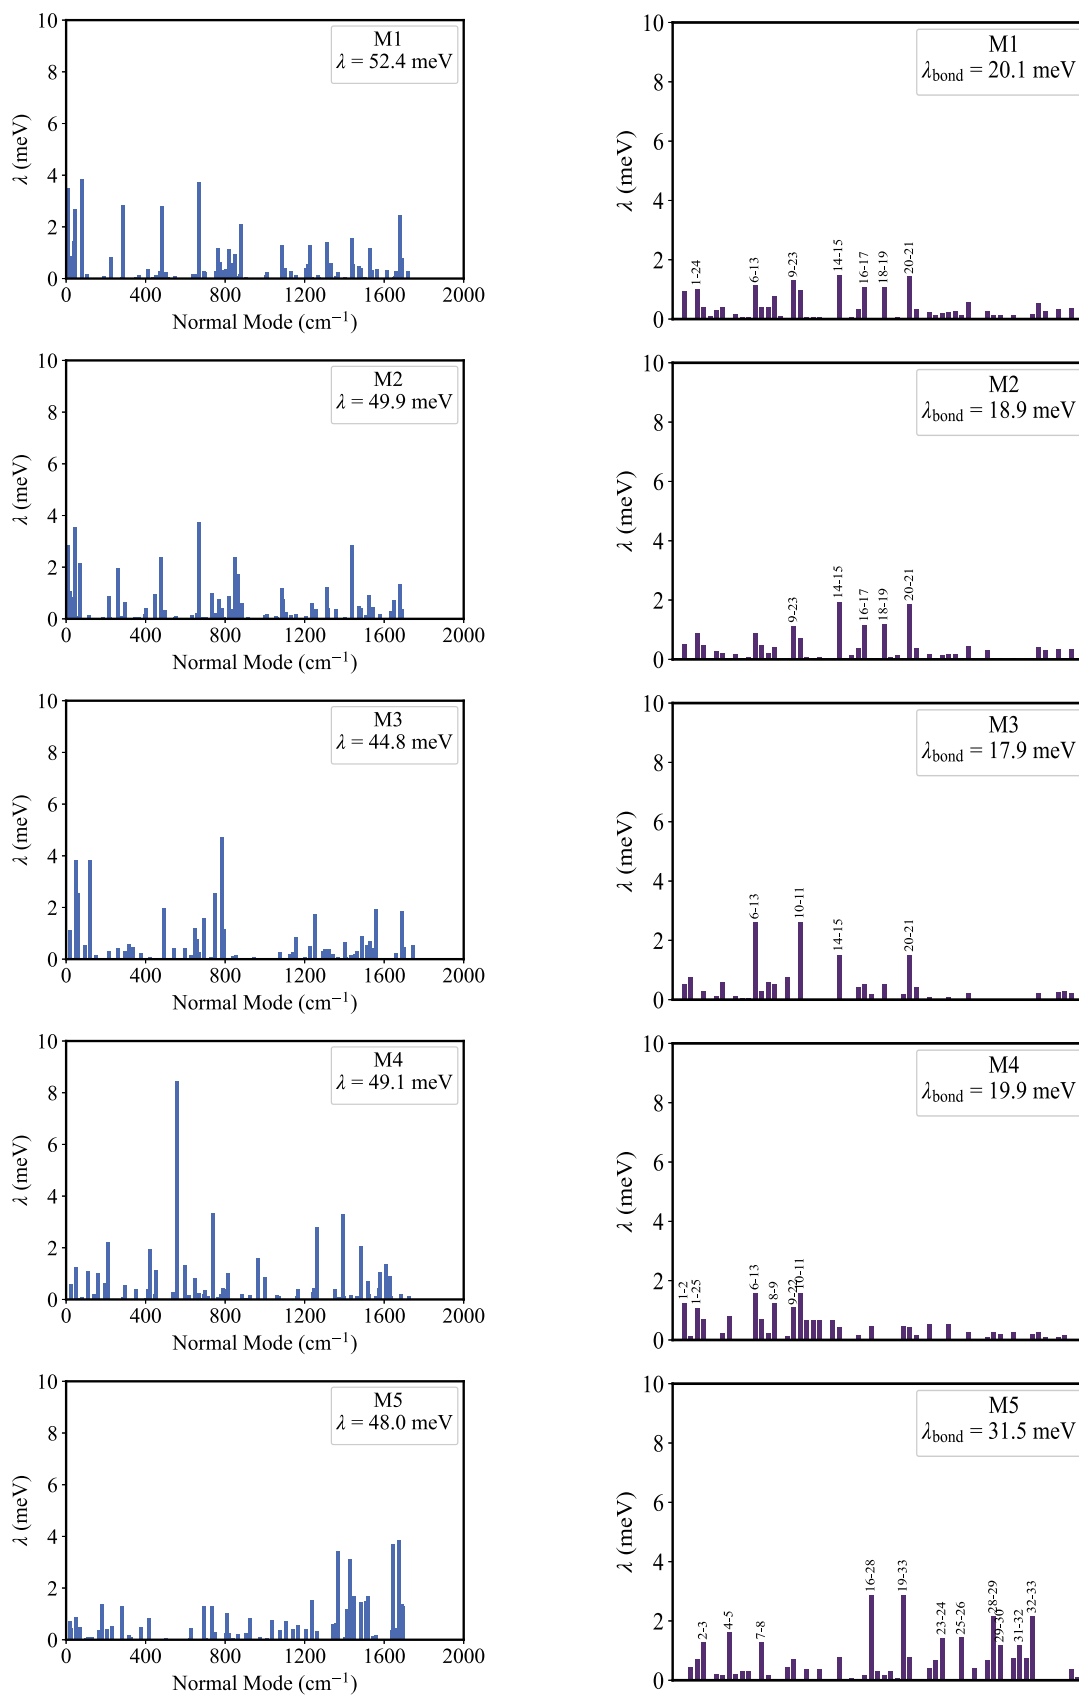

**Figure S6.** The contribution of the normal modes to  $\lambda_{em}$  (left), and the contribution of each chemical bond to  $\lambda_{BL}$  (right), for **M1**, **M2**, **M3**, **M4**, and **M5**.

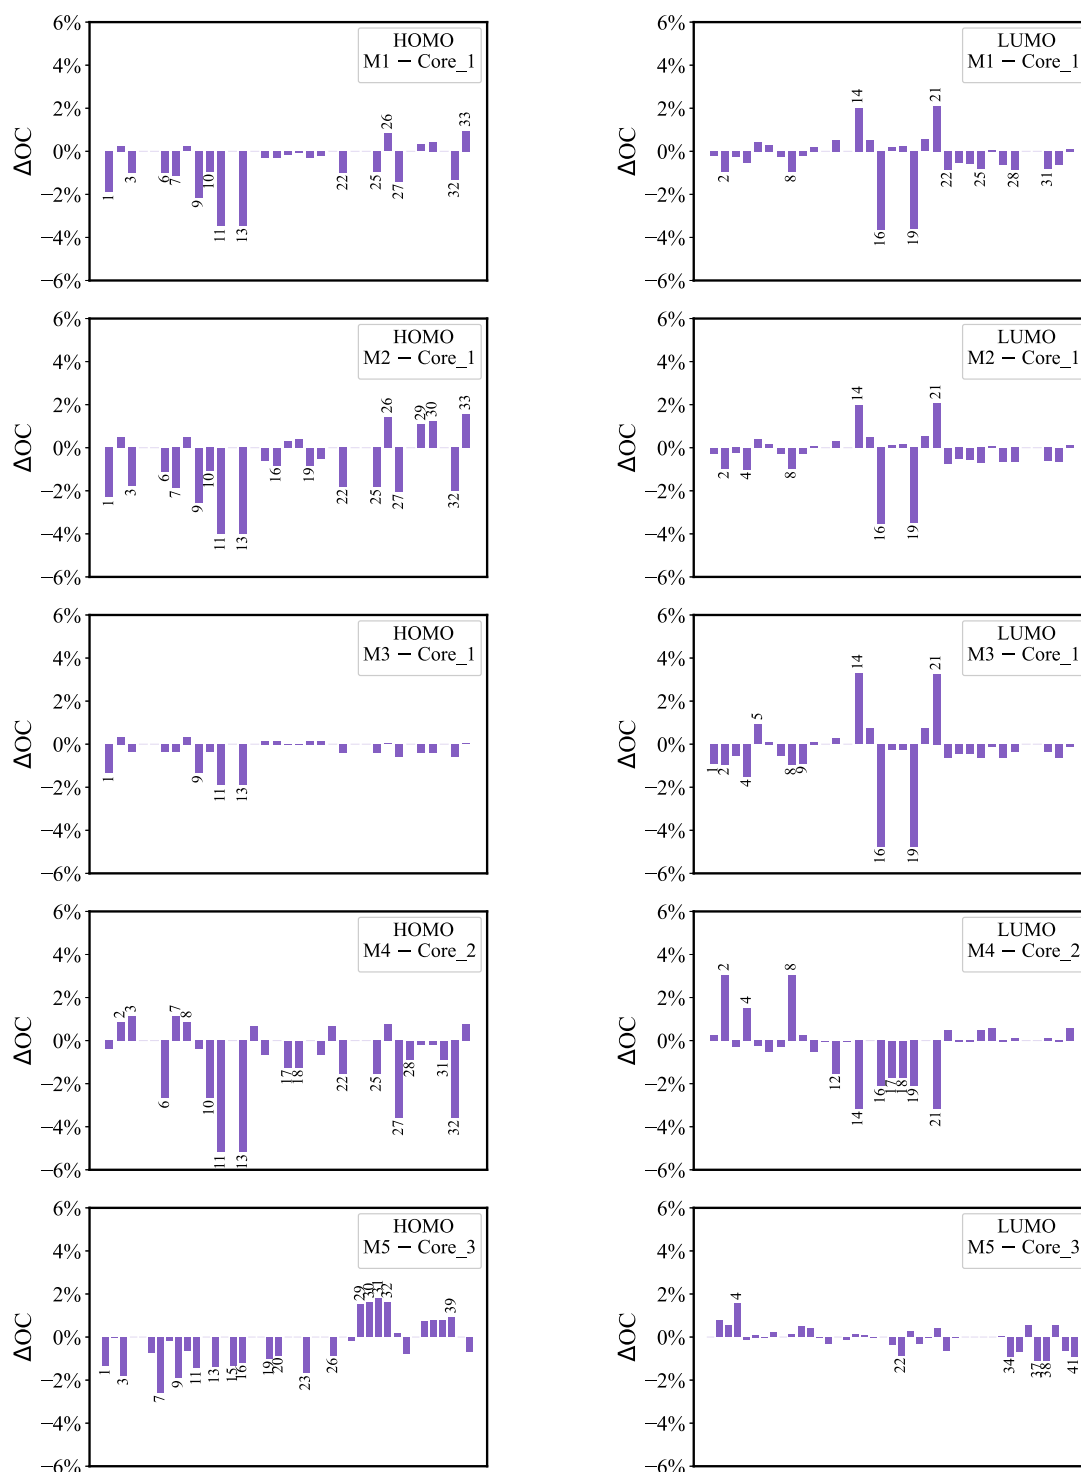

**Figure S7.** The difference in orbital composition of the top 5 molecules and their respective corresponding core.

**Table S1.** Calculated  $f_{\text{osc}}$  at the  $S_1$  geometry and SOC matrix element ( $\text{cm}^{-1}$ ) based on the  $S_1$  and  $T_1$  geometries.

|                       | DABNA-1 | M1    | M2    | M3    | M4    | M5    |
|-----------------------|---------|-------|-------|-------|-------|-------|
| $f_{\text{osc}}(S_1)$ | 0.163   | 0.449 | 0.471 | 0.457 | 0.287 | 1.037 |
| $\text{SOC}(S_1)$     | 0.044   | 0.011 | 0.068 | 0.006 | 0.052 | 0.037 |
| $\text{SOC}(T_1)$     | 0.043   | 0.008 | 0.077 | 0.011 | 0.095 | 0.034 |
